# Supplementary material for: Lymph node CXCR5+ NK cells associate with control of chronic SHIV infection
Source: PubMed Central journal article supplement (PMC9089783; doi:10.1172/jci.insight.155601), 2022-04-22
Supplement: jciinsight-7-155601-s046.pdf [file jciinsight-7-155601-s046.pdf]

1 **Supplementary Figures and Legends:**

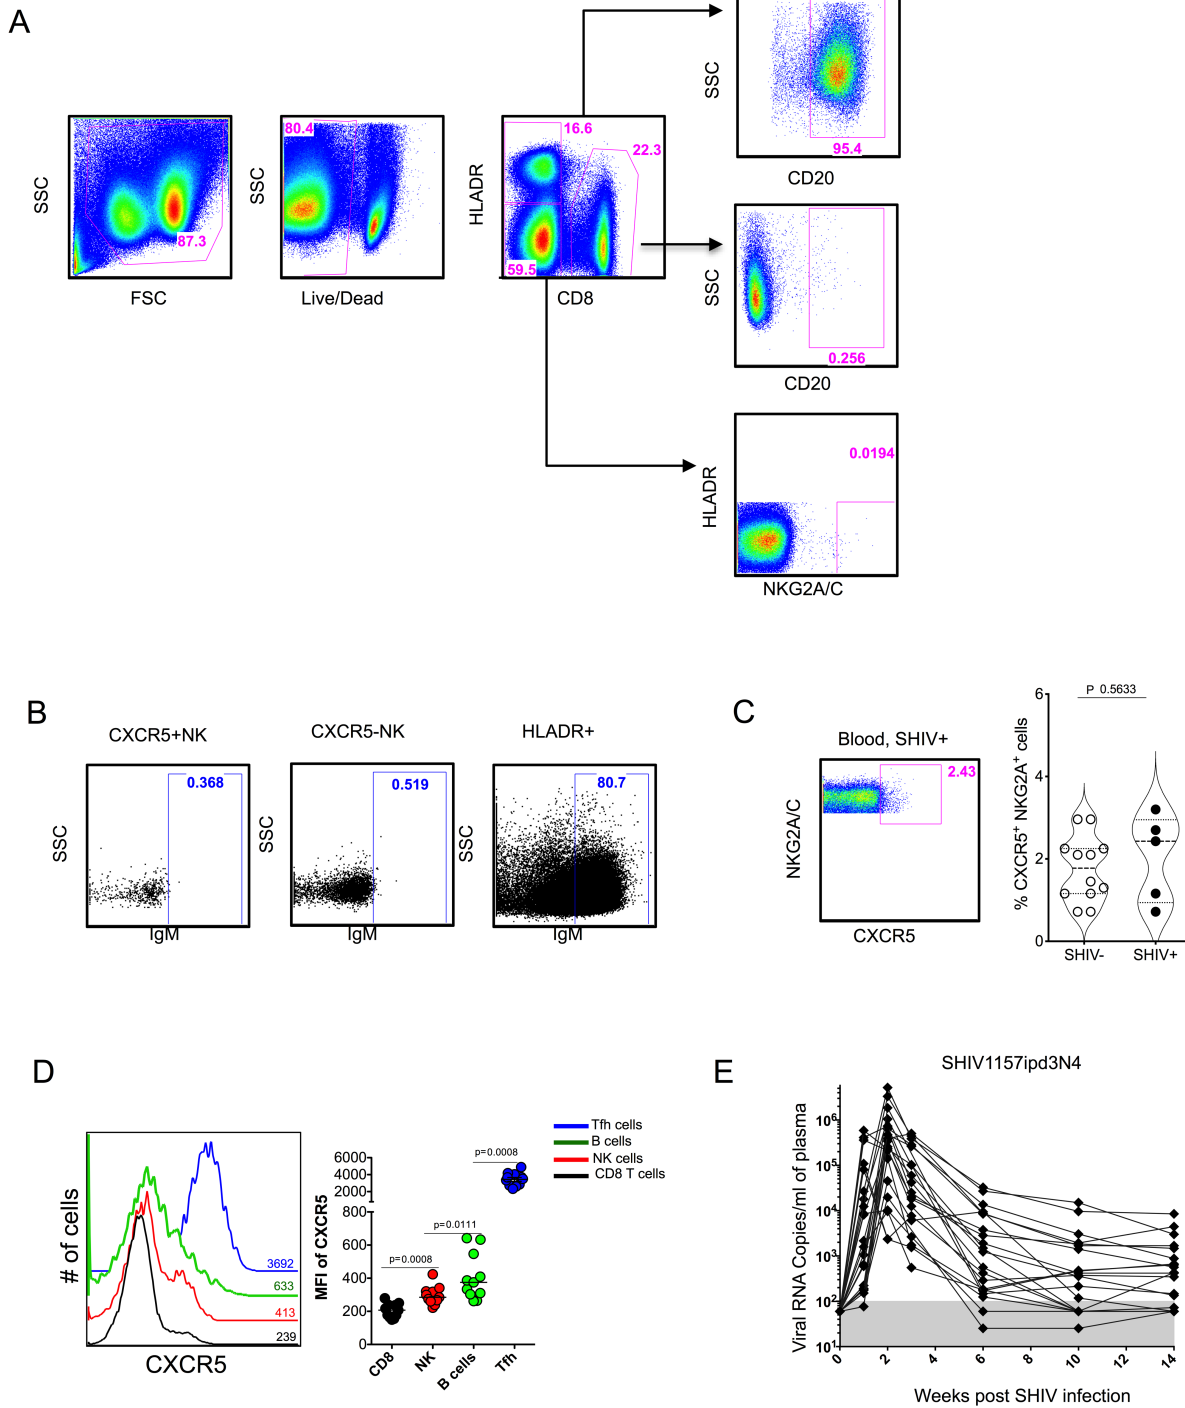

2  
3  
4  
5  
6

**Supplemental Figure 1.** (A) Gating Strategy for identifying CXCR5+ NK cells in the lymph node. (B) Representative flow plot display there is no IgM staining in NK cell subsets. Only HLADR+ cells are IgM+ cells in the macaque LN. (C) Representative flow plot display the expression of CXCR5 in blood NK cells. (D) MFI of CXCR5 on different subsets of lymph node cells. NK cells express higher levels of CXCR5 than CD8 T cells. (E) Viral RNA levels of macaques infected with SHIV1157ipd3N4 (n=21). Mann-Whitney test was used for comparison analysis.

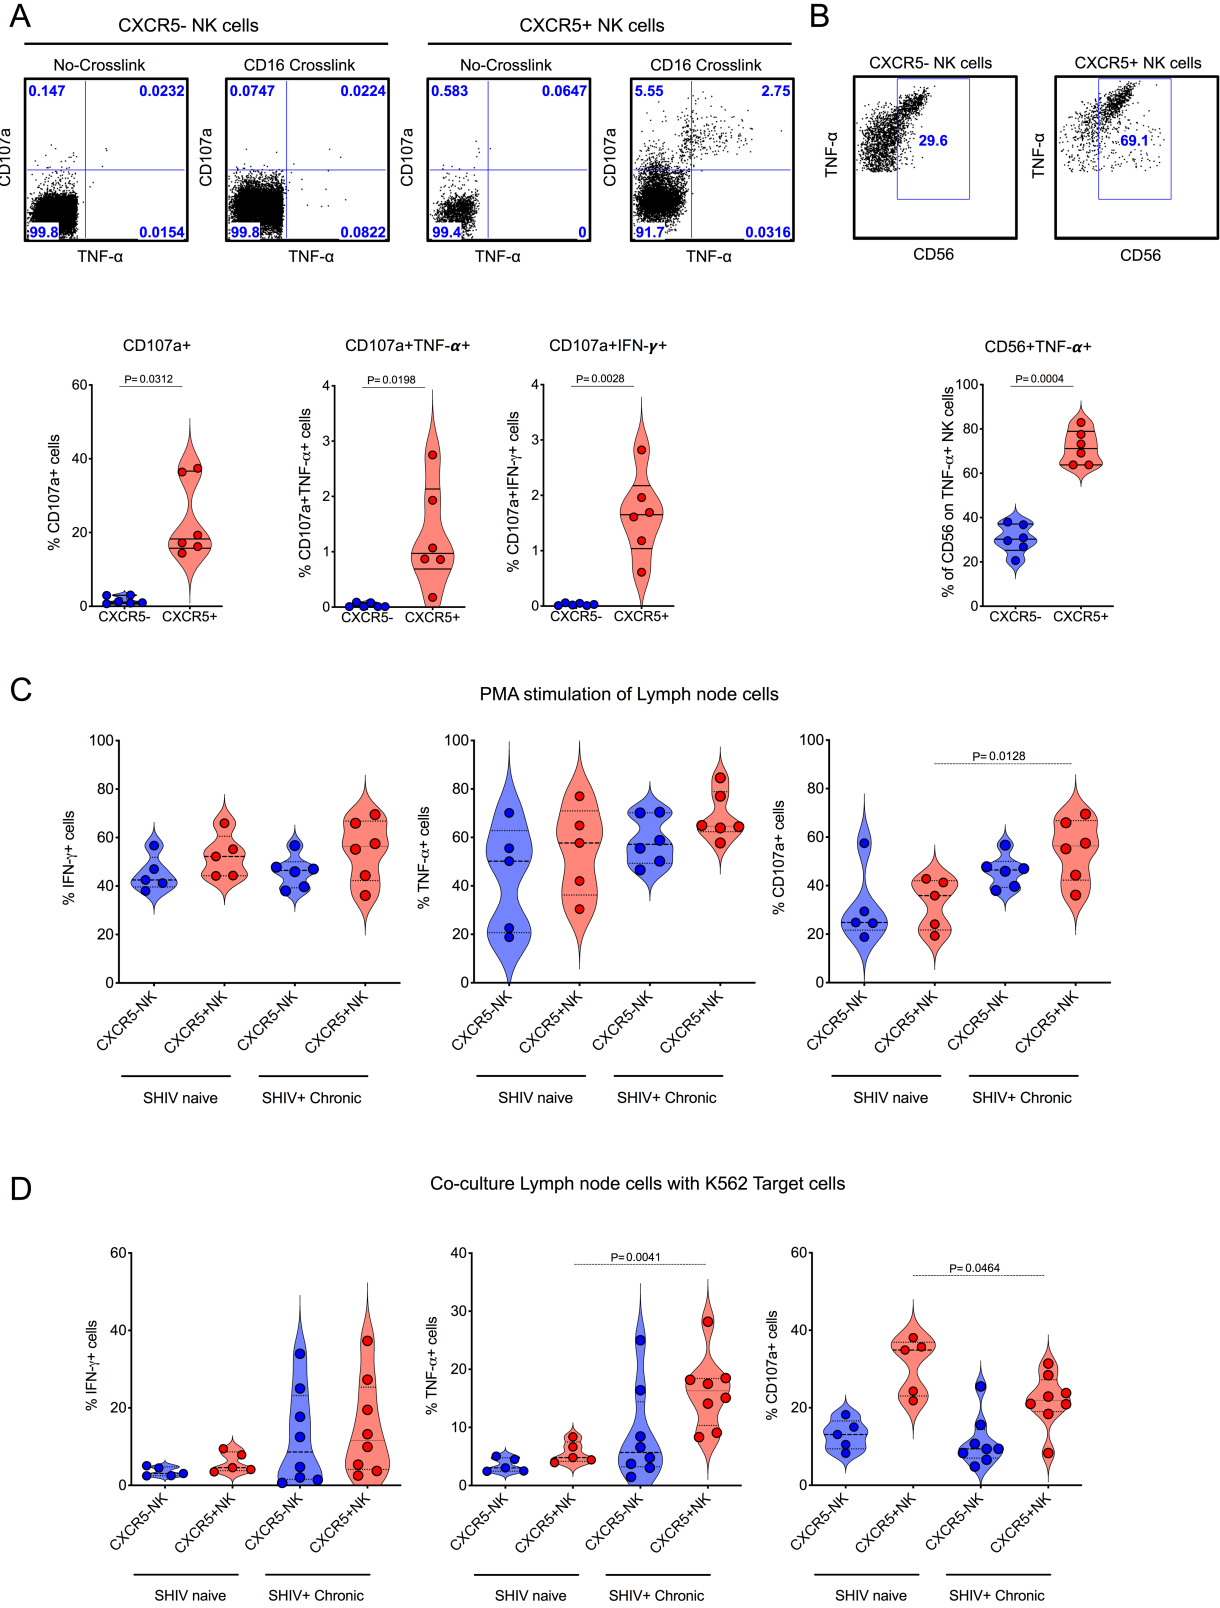

8 **Supplemental Figure 2.** (A) CD16 crosslinking experiment on LN cells. CXCR5<sup>+</sup>NK cells express higher levels of cytokines (n=6). (B) CD56  
9 expression is higher on the cytokine+ CXCR5<sup>+</sup> NK cells. Gating Strategy for identifying CXCR5<sup>+</sup> NK cells in the lymph node. (C) Cytokine  
10 expression and degranulation (CD107a<sup>+</sup> staining) profiles of CXCR5<sup>+</sup> and CXCR5<sup>-</sup> NK cells following 6-hours ex vivo culture in presence (PMA)  
11 or absence (NS) of PMA and ionomycin determined by intracellular cytokine staining and flow cytometry with SHIV naïve (n=5) and SHIV  
12 chronically infected animals (n=6). (D) Similar assessment of cytokine expression and degranulation of CXCR5<sup>+</sup> and CXCR5<sup>-</sup> NK cells following  
13 6-hours co-culture with MHC class I devoid K562 cells comparing SHIV naïve (n=5) and SHIV infected animals (n=8). Wilcoxon's matched-  
14 pairs signed rank test was used to compare the frequencies of CXCR5<sup>+</sup> NK cells between blood and lymph node.

Table: Snapshot of enrichment results

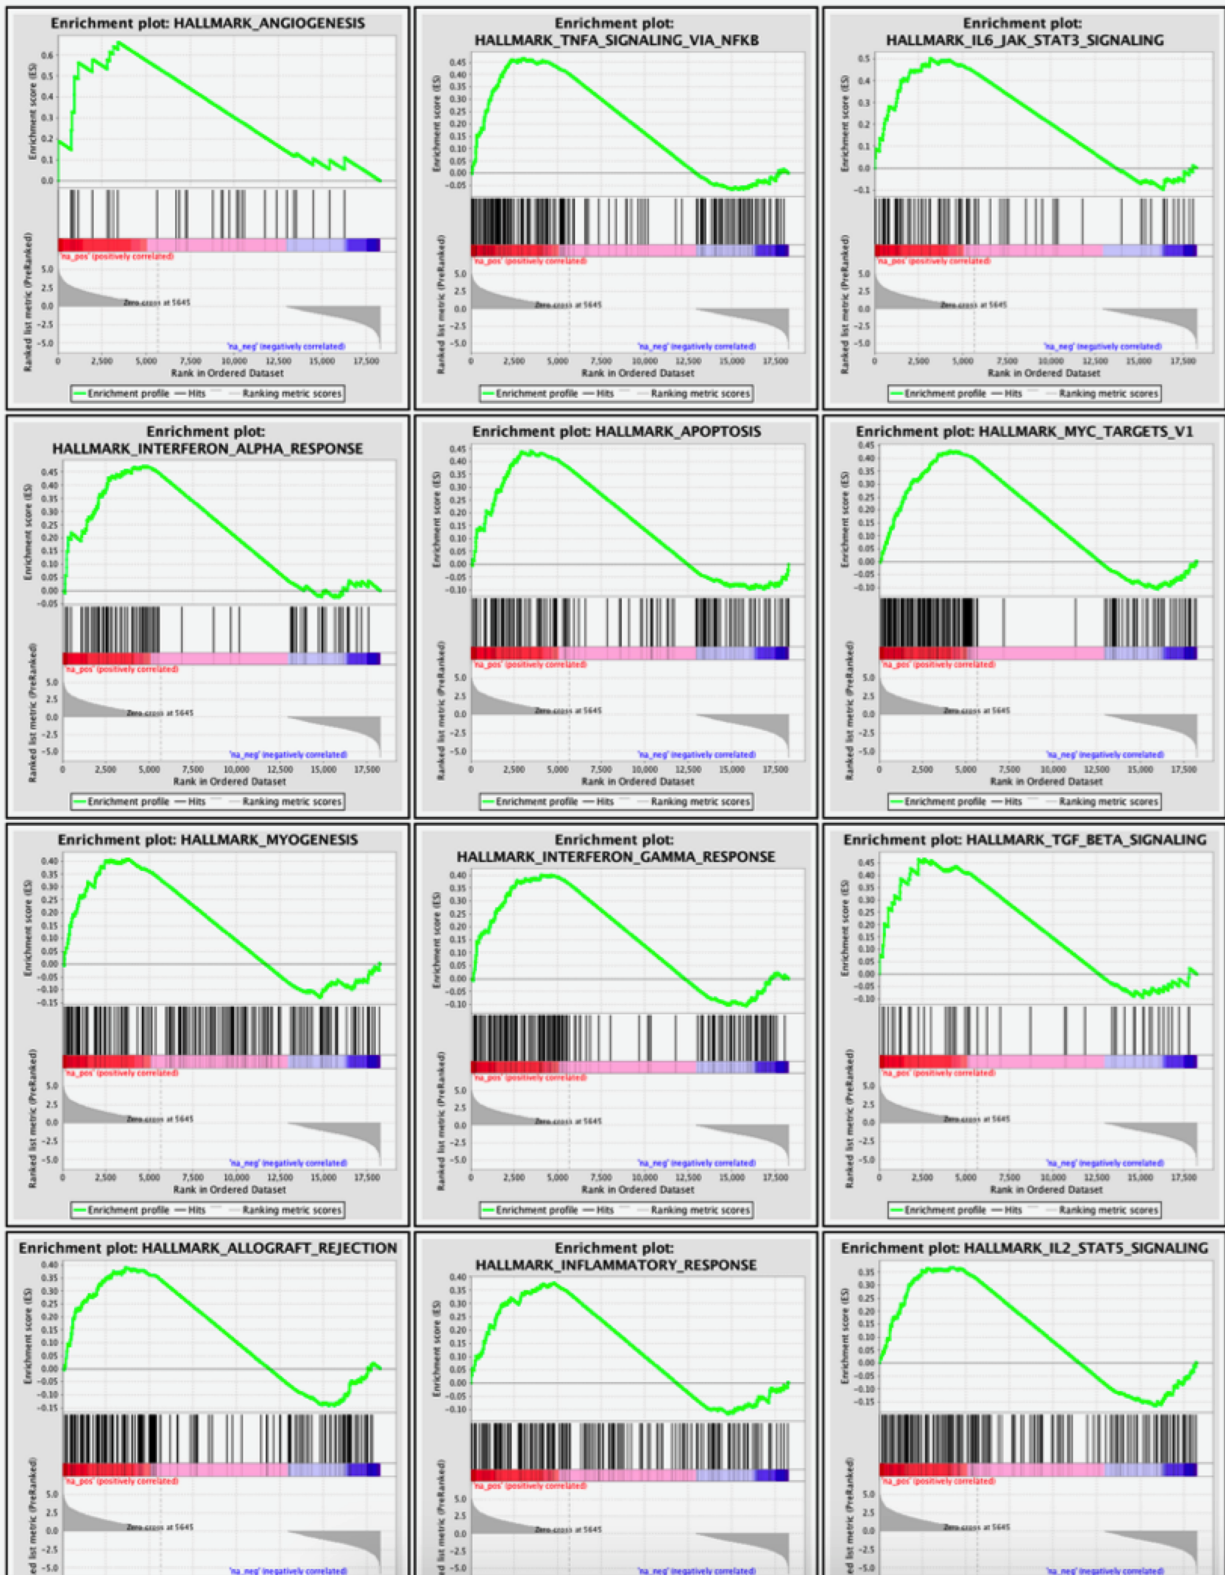

15

16



17 **Supplemental Figure 3.** Snap shot of GSEA plots enriched in CXCR5+ NK cells compared with CXCR5- NK cells in the LN of chronically SHIV  
18 infected animals (n=4).

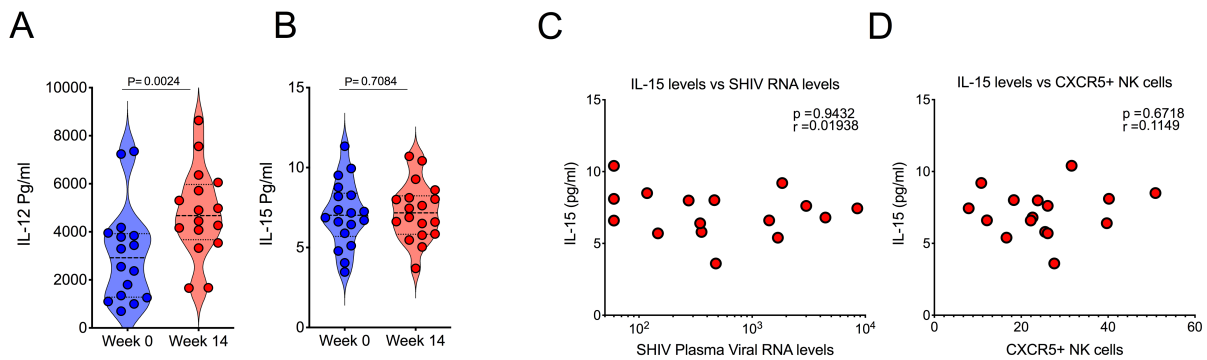

19  
20  
21 **Supplemental Figure 4.** (A) Plasma level concentration of IL-12p70 in pg/ml comparing SHIV naïve and SHIV infected animals (n=15), data  
22 display paired samples from uninfected and infected time points. (B) Plasma level concentration of IL-15 in pg/ml comparing SHIV naïve and  
23 SHIV infected animals, data display paired samples from uninfected and infected time points. (C) Correlation between plasma levels of IL-15  
24 cytokine with SHIV RNA levels (n=15). (D) Correlation between plasma levels of IL-15 cytokine with CXCR5+ NK cells (n=15). Mann-Whitney  
25 test was used invitro analysis. Pearson correlation was used for correlation analysis.

26  
27 **Supplemental Table: 1.** This table display cohort of SHIV infected macaques used in this study. A total  
28 of 22 animals have been studied.

29 **Supplemental Table: 2.** This table display antibodies and reagents used in this study.

30 **Supplemental Table: 3.** This table display gene set enrichment analyses to probe for alternations in major  
31 cytokine/chemokine genesets (obtained from Reactome database)

32 **Supplemental Table: 4.** This table display genesets were significantly associated (p-value <0.05; with the  
33 CXCR5 MFI across sorted CXCR5<sup>+</sup> and CXCR5<sup>-</sup> NK cell samples.

**Supplemental Table 1.** Cohort of SHIV infected rhesus macaques used for the study

| <b>Animal Name</b> | <b>Set-Point Viral Load (#)</b> | <b>Challenge Virus</b> | <b>Route of Infection</b> | <b>Mamu A01 Status</b> | <b>Sex</b> |
|--------------------|---------------------------------|------------------------|---------------------------|------------------------|------------|
| RFd15              | 60                              | SHIV1175               | Intra-rectal              | -                      | Female     |
| RCf15              | 478                             | SHIV1175               | Intra-rectal              | -                      | Male       |
| RSp15              | 464                             | SHIV1175               | Intra-rectal              | +                      | Female     |
| RWk14              | 275                             | SHIV1175               | Intra-rectal              | -                      | Female     |
| RGp15              | 429                             | SHIV1175               | Intra-rectal              | -                      | Male       |
| RYc15              | 4440                            | SHIV1175               | Intra-rectal              | -                      | Male       |
| RHv14              | 118                             | SHIV1175               | Intra-rectal              | -                      | Male       |
| RBr15              | 6                               | SHIV1175               | Intra-rectal              | -                      | Male       |
| RCe15              | 1843                            | SHIV1175               | Intra-rectal              | +                      | Male       |
| RRi15              | 35                              | SHIV1175               | Intra-rectal              | +                      | Male       |
| RJc15              | 418                             | SHIV1175               | Intra-rectal              | -                      | Female     |
| RKi15              | 60                              | SHIV1175               | Intra-rectal              | +                      | Male       |
| RSo15              | 1413                            | SHIV1175               | Intra-rectal              | -                      | Male       |
| 218-12             | 347                             | SHIV1175               | Intra-rectal              | -                      | Male       |
| RUc16              | 1688                            | SHIV1175               | Intra-rectal              | -                      | Male       |
| RJv15              | 60                              | SHIV1175               | Intra-rectal              | -                      | Female     |
| RFj15              | 60                              | SHIV1175               | Intra-rectal              | -                      | Female     |
| 127_12             | 60                              | SHIV1175               | Intra-rectal              | -                      | Female     |
| RHr15              | 147                             | SHIV1175               | Intra-rectal              | +                      | Male       |
| RWn15              | 60                              | SHIV1175               | Intra-rectal              | +                      | Male       |
| RJy15              | 8490                            | SHIV1175               | Intra-rectal              | -                      | Male       |
| RKe15              | 3005                            | SHIV1175               | Intra-rectal              | +                      | Male       |
| REr18              | -                               | -                      | -                         | +                      | Male       |
| RRq18              | -                               | -                      | -                         | +                      | Male       |
| RUw19              | -                               | -                      | -                         | +                      | Male       |
| RTj18              | -                               | -                      | -                         | +                      | Male       |
| RSi18              | -                               | -                      | -                         | -                      | Male       |

**Supplemental Table: 2 List of antibodies used for staining blood and lymph nodes**

| <b>MARKER</b> | <b>COLOR</b> | <b>CLONE</b>          | <b>COMPANY</b>       |
|---------------|--------------|-----------------------|----------------------|
| CD3           | BUV395       | SP34-2                | BD Biosciences       |
| CCR7          | BV785        | 150503                | R & D System         |
| CD8 $\alpha$  | PerCp        | T8/7Pt-3F9            | NHP Resource Program |
| CD8 $\alpha$  | PerCp        | SK1                   | Bio Legend           |
| CD16          | BV650        | 3G8                   | BD Biosciences       |
| CD56          | PEcy7        | NCAM16.2              | BD Biosciences       |
| NKG2A         | PE           | Z199                  | Beckman-Coulter      |
| CD20          | Alexa-700    | 2H7                   | BD Biosciences       |
| HLA-DR        | Per-Cp       | G46-6                 | BD Biosciences       |
| CXCR3         | BV605        | IC6                   | BD Biosciences       |
| CCR6          | Amcyan       | 11A9                  | BD Biosciences       |
| CCR7          | FITC         | 150503                | R & D System         |
| CCR4          | Petexred     | 1G1                   | BD Biosciences       |
| CD32a         | PE           | FL18.26               | BD Biosciences       |
| CD69          | Alex-700     | FN50                  | BD Biosciences       |
| Ki67          | PeCy7        | B56                   | BD Biosciences       |
| Perforin      | FITC         | Mab-Pf344             | MabTech              |
| Granzyme-B    | Alex-700     | GB-11                 | BD Biosciences       |
| BCL-6         | FITC         | K112-91               | BD Biosciences       |
| IFN-g         | Alexa-700    | B27                   | BD Biosciences       |
| TNF-a         | PEtex-red    | Mab11                 | BD Biosciences       |
| CD107a        | FITC         | H4A3                  | BD Biosciences       |
| L/D           | APC H7       | Fixable Near IR stain | Invitrogen           |
| CXCR5         | PE           |                       | NHP Resource Program |

|                                      |                  |       |                |
|--------------------------------------|------------------|-------|----------------|
| FASL                                 | PECy7            | NOK-1 | Biolegend      |
| Anti-CD16                            | Purified         | 3G8   | Biolegend      |
| <b>OTHER REAGENTS</b>                |                  |       |                |
| <b>REAGENT</b>                       | <b>CATALOGUE</b> |       | <b>COMPANY</b> |
| Cytofix/Cytoperm                     | 51-2090KZ        |       | BD Biosciences |
| BD Perm/Wash                         | 51-2091KZ        |       | BD Biosciences |
| BD FACS™ Lysing solution             | 349202           |       | BD Biosciences |
| BD FACS™ Permeabilizing solution 2   | 340973           |       | BD Biosciences |
| Fixtion/Permeabilization concentrate | 00-5123-43       |       | Invitrogen     |
| Fixation Perm Diluent                | 00-5223-56       |       | Invitrogen     |
| Permeabilization Buffer              | 00-8333-56       |       | Invitrogen     |

### Supplemental Table: 3: Gene set enrichment analysis obtained from reactome database

| Geneset                                                       | Source                                                                                                                                                                                                                              |
|---------------------------------------------------------------|-------------------------------------------------------------------------------------------------------------------------------------------------------------------------------------------------------------------------------------|
| REACTOME_CHEMOKINE_RECEPTORS_BIND_CHEMOKINES                  | <a href="http://www.gsea-msigdb.org/gsea/msigdb/cards/REACTOME_CHEMOKINE_RECEPTORS_BIND_CHEMOKINES">http://www.gsea-msigdb.org/gsea/msigdb/cards/REACTOME_CHEMOKINE_RECEPTORS_BIND_CHEMOKINES</a>                                   |
| REACTOME_SIGNALING_BY_GPCR                                    | <a href="http://www.gsea-msigdb.org/gsea/msigdb/cards/REACTOME_SIGNALING_BY_GPCR">http://www.gsea-msigdb.org/gsea/msigdb/cards/REACTOME_SIGNALING_BY_GPCR</a>                                                                       |
| REACTOME_CLASS_I_MHC_MEDIATED_ANTIGEN_PROCESSING_PRESENTATION | <a href="http://www.gsea-msigdb.org/gsea/msigdb/cards/REACTOME_CLASS_I_MHC_MEDIATED_ANTIGEN_PROCESSING_PRESENTATION">http://www.gsea-msigdb.org/gsea/msigdb/cards/REACTOME_CLASS_I_MHC_MEDIATED_ANTIGEN_PROCESSING_PRESENTATION</a> |
| REACTOME_ANTIGEN_PROCESSING_CROSS_PRESENTATION                | <a href="http://www.gsea-msigdb.org/gsea/msigdb/cards/REACTOME_ANTIGEN_PROCESSING_CROSS_PRESENTATION">http://www.gsea-msigdb.org/gsea/msigdb/cards/REACTOME_ANTIGEN_PROCESSING_CROSS_PRESENTATION</a>                               |
| REACTOME_MHC_CLASS_II_ANTIGEN_PRESENTATION                    | <a href="http://www.gsea-msigdb.org/gsea/msigdb/cards/REACTOME_MHC_CLASS_II_ANTIGEN_PRESENTATION">http://www.gsea-msigdb.org/gsea/msigdb/cards/REACTOME_MHC_CLASS_II_ANTIGEN_PRESENTATION</a>                                       |
| REACTOME_INTERLEUKIN_6_SIGNALING                              | <a href="http://www.gsea-msigdb.org/gsea/msigdb/cards/REACTOME_INTERLEUKIN_6_SIGNALING">http://www.gsea-msigdb.org/gsea/msigdb/cards/REACTOME_INTERLEUKIN_6_SIGNALING</a>                                                           |
| REACTOME_INTERLEUKIN_7_SIGNALING                              | <a href="http://www.gsea-msigdb.org/gsea/msigdb/cards/REACTOME_INTERLEUKIN_7_SIGNALING">http://www.gsea-msigdb.org/gsea/msigdb/cards/REACTOME_INTERLEUKIN_7_SIGNALING</a>                                                           |
| REACTOME_INTERLEUKIN_17_SIGNALING                             | <a href="http://www.gsea-msigdb.org/gsea/msigdb/cards/REACTOME_INTERLEUKIN_17_SIGNALING">http://www.gsea-msigdb.org/gsea/msigdb/cards/REACTOME_INTERLEUKIN_17_SIGNALING</a>                                                         |
| REACTOME_INTERLEUKIN_3_INTERLEUKIN_5_AND_GM-CSF_SIGNALING     | <a href="http://www.gsea-msigdb.org/gsea/msigdb/cards/REACTOME_INTERLEUKIN_3_INTERLEUKIN_5_AND_GM-CSF_SIGNALING">http://www.gsea-msigdb.org/gsea/msigdb/cards/REACTOME_INTERLEUKIN_3_INTERLEUKIN_5_AND_GM-CSF_SIGNALING</a>         |
| REACTOME_INTERLEUKIN_10_SIGNALING                             | <a href="http://www.gsea-msigdb.org/gsea/msigdb/cards/REACTOME_INTERLEUKIN_10_SIGNALING">http://www.gsea-msigdb.org/gsea/msigdb/cards/REACTOME_INTERLEUKIN_10_SIGNALING</a>                                                         |
| REACTOME_INTERLEUKIN_4_AND_INTERLEUKIN_13_SIGNALING           | <a href="http://www.gsea-msigdb.org/gsea/msigdb/cards/REACTOME_INTERLEUKIN_4_AND_INTERLEUKIN_13_SIGNALING">http://www.gsea-msigdb.org/gsea/msigdb/cards/REACTOME_INTERLEUKIN_4_AND_INTERLEUKIN_13_SIGNALING</a>                     |
| REACTOME_INTERLEUKIN_15_SIGNALING                             | <a href="http://www.gsea-msigdb.org/gsea/msigdb/cards/REACTOME_INTERLEUKIN_15_SIGNALING">http://www.gsea-msigdb.org/gsea/msigdb/cards/REACTOME_INTERLEUKIN_15_SIGNALING</a>                                                         |
| REACTOME_INTERLEUKIN_35_SIGNALING                             | <a href="http://www.gsea-msigdb.org/gsea/msigdb/cards/REACTOME_INTERLEUKIN_35_SIGNALING">http://www.gsea-msigdb.org/gsea/msigdb/cards/REACTOME_INTERLEUKIN_35_SIGNALING</a>                                                         |
| REACTOME_INTERLEUKIN_9_SIGNALING                              | <a href="http://www.gsea-msigdb.org/gsea/msigdb/cards/REACTOME_INTERLEUKIN_9_SIGNALING">http://www.gsea-msigdb.org/gsea/msigdb/cards/REACTOME_INTERLEUKIN_9_SIGNALING</a>                                                           |
| REACTOME_INTERLEUKIN_37_SIGNALING                             | <a href="http://www.gsea-msigdb.org/gsea/msigdb/cards/REACTOME_INTERLEUKIN_37_SIGNALING">http://www.gsea-msigdb.org/gsea/msigdb/cards/REACTOME_INTERLEUKIN_37_SIGNALING</a>                                                         |
| REACTOME_INTERLEUKIN_18_SIGNALING                             | <a href="http://www.gsea-msigdb.org/gsea/msigdb/cards/REACTOME_INTERLEUKIN_18_SIGNALING">http://www.gsea-msigdb.org/gsea/msigdb/cards/REACTOME_INTERLEUKIN_18_SIGNALING</a>                                                         |
| REACTOME_INTERLEUKIN_2_SIGNALING                              | <a href="http://www.gsea-msigdb.org/gsea/msigdb/cards/REACTOME_INTERLEUKIN_2_SIGNALING">http://www.gsea-msigdb.org/gsea/msigdb/cards/REACTOME_INTERLEUKIN_2_SIGNALING</a>                                                           |
| REACTOME_INTERLEUKIN_12_SIGNALING                             | <a href="http://www.gsea-msigdb.org/gsea/msigdb/cards/REACTOME_INTERLEUKIN_12_SIGNALING">http://www.gsea-msigdb.org/gsea/msigdb/cards/REACTOME_INTERLEUKIN_12_SIGNALING</a>                                                         |
| REACTOME_INTERLEUKIN_1_SIGNALING                              | <a href="http://www.gsea-msigdb.org/gsea/msigdb/cards/REACTOME_INTERLEUKIN_1_SIGNALING">http://www.gsea-msigdb.org/gsea/msigdb/cards/REACTOME_INTERLEUKIN_1_SIGNALING</a>                                                           |
| REACTOME_INTERLEUKIN_23_SIGNALING                             | <a href="http://www.gsea-msigdb.org/gsea/msigdb/cards/REACTOME_INTERLEUKIN_23_SIGNALING">http://www.gsea-msigdb.org/gsea/msigdb/cards/REACTOME_INTERLEUKIN_23_SIGNALING</a>                                                         |
| REACTOME_INTERLEUKIN_27_SIGNALING                             | <a href="http://www.gsea-msigdb.org/gsea/msigdb/cards/REACTOME_INTERLEUKIN_27_SIGNALING">http://www.gsea-msigdb.org/gsea/msigdb/cards/REACTOME_INTERLEUKIN_27_SIGNALING</a>                                                         |
| REACTOME_INTERLEUKIN_21_SIGNALING                             | <a href="http://www.gsea-msigdb.org/gsea/msigdb/cards/REACTOME_INTERLEUKIN_21_SIGNALING">http://www.gsea-msigdb.org/gsea/msigdb/cards/REACTOME_INTERLEUKIN_21_SIGNALING</a>                                                         |
| REACTOME_SIGNALING_BY_TGF_BETA_FAMILY_MEMBERS                 | <a href="http://www.gsea-msigdb.org/gsea/msigdb/cards/REACTOME_SIGNALING_BY_TGF_BETA_FAMILY_MEMBERS">http://www.gsea-msigdb.org/gsea/msigdb/cards/REACTOME_SIGNALING_BY_TGF_BETA_FAMILY_MEMBERS</a>                                 |
| REACTOME_TNF_SIGNALING                                        | <a href="http://www.gsea-msigdb.org/gsea/msigdb/cards/REACTOME_TNF_SIGNALING">http://www.gsea-msigdb.org/gsea/msigdb/cards/REACTOME_TNF_SIGNALING</a>                                                                               |

### Supplemental Table: 4: Gene set enrichment analysis

| pathway                                        | pval       | NES          |
|------------------------------------------------|------------|--------------|
| REACTOME_CHEMOKINE_RECEPTORS_BIND_CHEMOKINES   | 0.00437351 | 1.714192456  |
| REACTOME_INTERLEUKIN_12_SIGNALING              | 0.01250788 | 1.614360914  |
| REACTOME_INTERLEUKIN_35_SIGNALLING             | 0.02851897 | 1.526767284  |
| REACTOME_INTERLEUKIN_7_SIGNALING               | 0.02926404 | 1.519492681  |
| REACTOME_INTERLEUKIN_15_SIGNALING              | 0.05291971 | 1.498999658  |
| REACTOME_ANTIGEN_PROCESSING_CROSS_PRESENTATION | 0.00619051 | -1.902149855 |

| pathway                                        | leadingEdge                                                                                                            |
|------------------------------------------------|------------------------------------------------------------------------------------------------------------------------|
| REACTOME_CHEMOKINE_RECEPTORS_BIND_CHEMOKINES   | CXCR3 CCL5 CCR6 CCR7 CXCR5 XCL2                                                                                        |
| REACTOME_INTERLEUKIN_12_SIGNALING              | MSN JAK1 CAPZA1 HNRNPF ARF1 RAP1B LCP1 AIP CNN2 IL12RB1 IL12RB2 JAK2                                                   |
| REACTOME_INTERLEUKIN_35_SIGNALLING             | JAK1 STAT3 IL27RA IL12RB2 JAK2 EB13 STAT4                                                                              |
| REACTOME_INTERLEUKIN_7_SIGNALING               | JAK1 IL2RG STAT3 STAT5A SOCS1 CISH JAK3                                                                                |
| REACTOME_INTERLEUKIN_15_SIGNALING              | JAK1 IL2RG STAT3 STAT5A IL15RA SOS2 JAK3 IL2RB SOS1                                                                    |
| REACTOME_ANTIGEN_PROCESSING_CROSS_PRESENTATION | B2M UBC TAP1 PSMD1 UBB PSMA7 PSMB1 PSMB6 PSMD14 PSMD8 CTSS PSME1 MYD88 PSMA1 UBA52 PSMB7 CALR IKBKG VAMP8 RPS27A TIRAP |
